# Supplementary material for: Planting Age Identification and Yield Prediction of Apple Orchard Using Time-Series Spectral Endmember and Logistic Growth Model
Source: MDPI journal article supplement (doi:10.3390/rs15030642), 2023-01-21
Supplement: s1 [file s1]

Archive with 1 entries (1 files):
- remotesensing-2125030-supplementary.pdf
