# Supplementary material for: Planting Age Identification and Yield Prediction of Apple Orchard Using Time-Series Spectral Endmember and Logistic Growth Model
Source: MDPI journal article supplement (doi:10.3390/rs15030642), 2023-01-21
Supplement: s1 [file s1 › remotesensing-2125030-supplementary.pdf]

## Supplementary for

### Planting Age Identification and Yield Prediction of Apple Orchard Using Time-Series Spectral Endmember and Logistic Growth Model

Xiang Gao <sup>1,†</sup>, Wenchao Han <sup>1,†</sup>, Qiyuan Hu <sup>1</sup>, Yuting Qin <sup>1</sup>, Sijia Wang <sup>1</sup>, Fei Lun <sup>1</sup>, Jing Sun <sup>2</sup>, Jiechen Wu <sup>3</sup>, Xiao Xiao <sup>4</sup>, Yang Lan <sup>5</sup> and Hong Li <sup>6,\*</sup>

1 College of Land Science and Technology, China Agricultural University, Beijing 100193, China

2 Institute of Agricultural Resources and Regional Planning, Chinese Academy of Agricultural Sciences, Beijing 100081, China

3 Department of Sustainable Development, Environmental Science and Engineering (SEED), KTH Royal Institute of Technology, SE-100 44, Stockholm, Sweden

4 College of Resources and Environmental Sciences, China Agricultural University, Beijing 100193, China

5 The Bartlett School of Environment, Energy and Resources, University College London, London WC1E 6BT, UK

6 Institute of Plant Nutrition and Resources, Beijing Academy of Agriculture and Forestry Sciences, Beijing 100097, China

\* Correspondence: lihong@baafs.net.cn

† These authors contributed equally to this work.

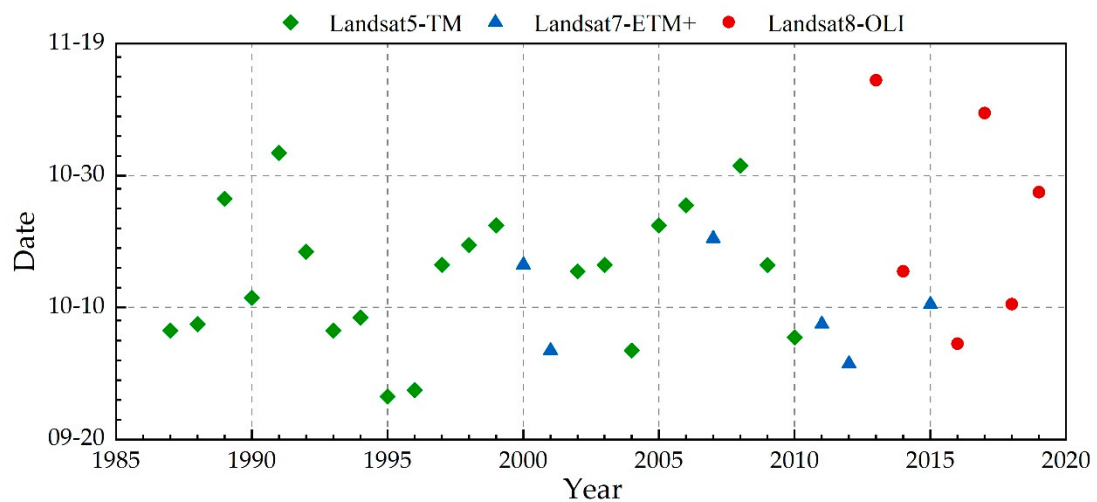

**Figure S1.** Data source and time of remote sensing image.

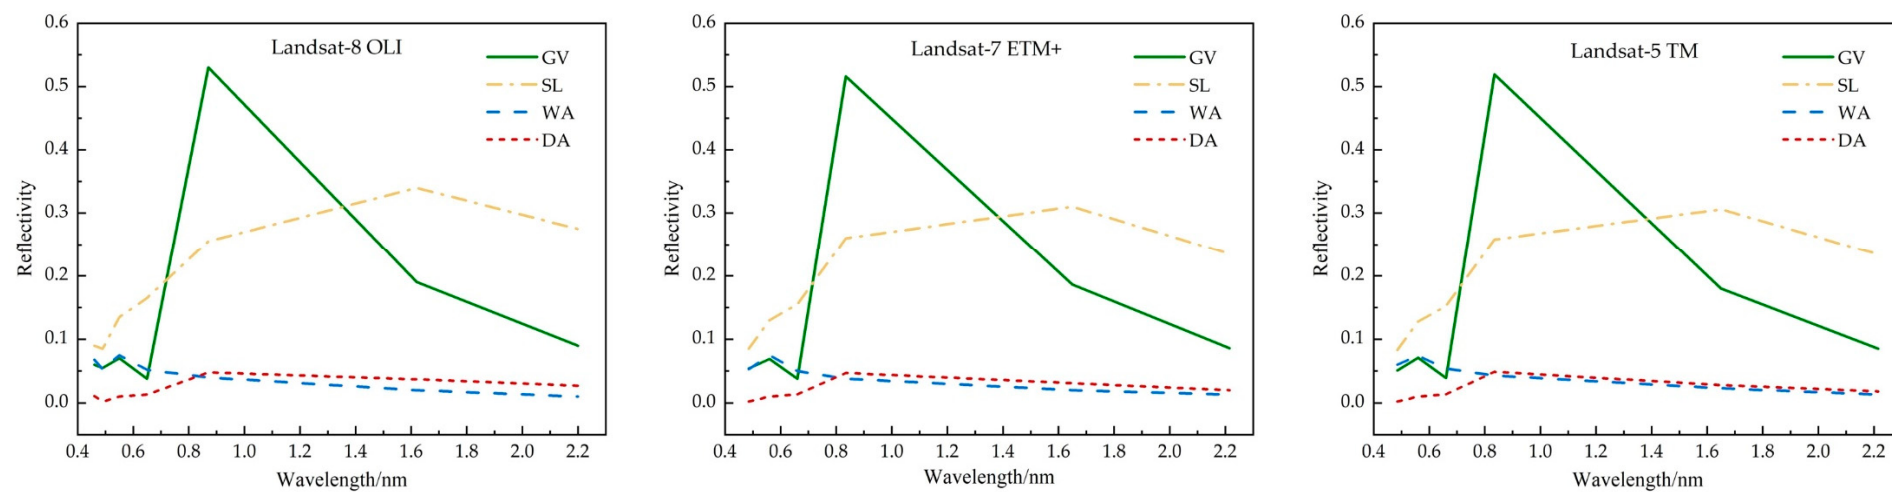

**Figure S2.** The spectral information of pure endmembers for each of the three sensors.

**Table S1.** 2018-2019 Statistical Yearbook Data

| County     | 2018 Yield<br>(metric ton) | 2018 Area (mu) | 2019 Yield<br>(metric ton) | 2019 Area (mu) |
|------------|----------------------------|----------------|----------------------------|----------------|
| Sujiadian  | 129778                     | 47260          | 102483                     | 38284          |
| Sikou      | 63926                      | 21856          | 80974                      | 34842          |
| Xicheng    | 73103                      | 33910          | 75224                      | 30930          |
| Guandao    | 189040                     | 63165          | 189265                     | 63316          |
| Guanli     | 176631                     | 59937          | 227892                     | 58353          |
| Yangchu    | 126646                     | 42337          | 126585                     | 42780          |
| Shewopo    | 316057                     | 117058         | 279012                     | 93004          |
| Taochun    | 152412                     | 54066          | 130380                     | 57699          |
| Tingkou    | 171561                     | 57325          | 180563                     | 60288          |
| Songshan   | 128047                     | 45094          | 134733                     | 45094          |
| Zhuangyuan | 34783                      | 16190          | 34993                      | 16510          |
| Cuiping    | 48841                      | 18981          | 56072                      | 19443          |

1. mu, a Chinese unit of area (equal to 1/15 of a hectare).

### S1. Evaluation indicators of orchard planting suitability

Water, heat, sunlight, and topographic conditions in the planting region are essential for apple growth. Research has shown that the optimum climate conditions for apple growing include 500-800 mm of annual precipitation, 9-12.5 °C of annual mean temperature, 2800-3600 °C of annual cumulative temperature, a daily temperature difference of no more than 10 °C in the summer, 2500 hours of annual sunshine, and soil pH from 6.5 to 7. We constructed an index system to evaluate the suitability of orchard planting

In addition, the spatial interpolation method, segmental scoring method and spatial simulation modeling method were used to spatially standardize each index and calculate the orchard planting suitability in the study area according to Equation (1). The orchard planting suitability can show the ecological suitability of apple planting in the study area, which is useful for comparing the spatial differences in apple planting suitability and rational planning of planting areas. The specific calculation formula is as follows.

$$S = \sum_{j=1}^m \left( \sum_{i=1}^n X_i \times W_i \right) \times W_j \quad (1)$$

Where  $S$  is the suitability of orchard planting;  $w_j$  is the weight of primary evaluation index;  $x_i$  is the standardized value of secondary evaluation index;  $w_i$  is the weight of secondary evaluation index;  $m$  is the number of primary evaluation index;  $n$  is the number of secondary evaluation index.

**Table S2.** Orchard planting suitability evaluation system

| Dimension           | Indicators                                  | Weight |
|---------------------|---------------------------------------------|--------|
| Terrain<br>(0.1976) | Elevation (m)                               | 0.1810 |
|                     | Slope (°)                                   | 0.4095 |
|                     | Slope Direction (°)                         | 0.4095 |
| Soil<br>(0.3119)    | Soil Texture                                | 0.5390 |
|                     | pH                                          | 0.2973 |
|                     | Soil Organic Matter Content (g/kg)          | 0.1638 |
| Climate<br>(0.4905) | Annual precipitation (mm)                   | 0.1209 |
|                     | Daily difference in summer temperature (°C) | 0.4168 |
|                     | ≥10°C annual accumulation temperature (°C)  | 0.1928 |
|                     | Annual sunshine hours (h)                   | 0.2695 |

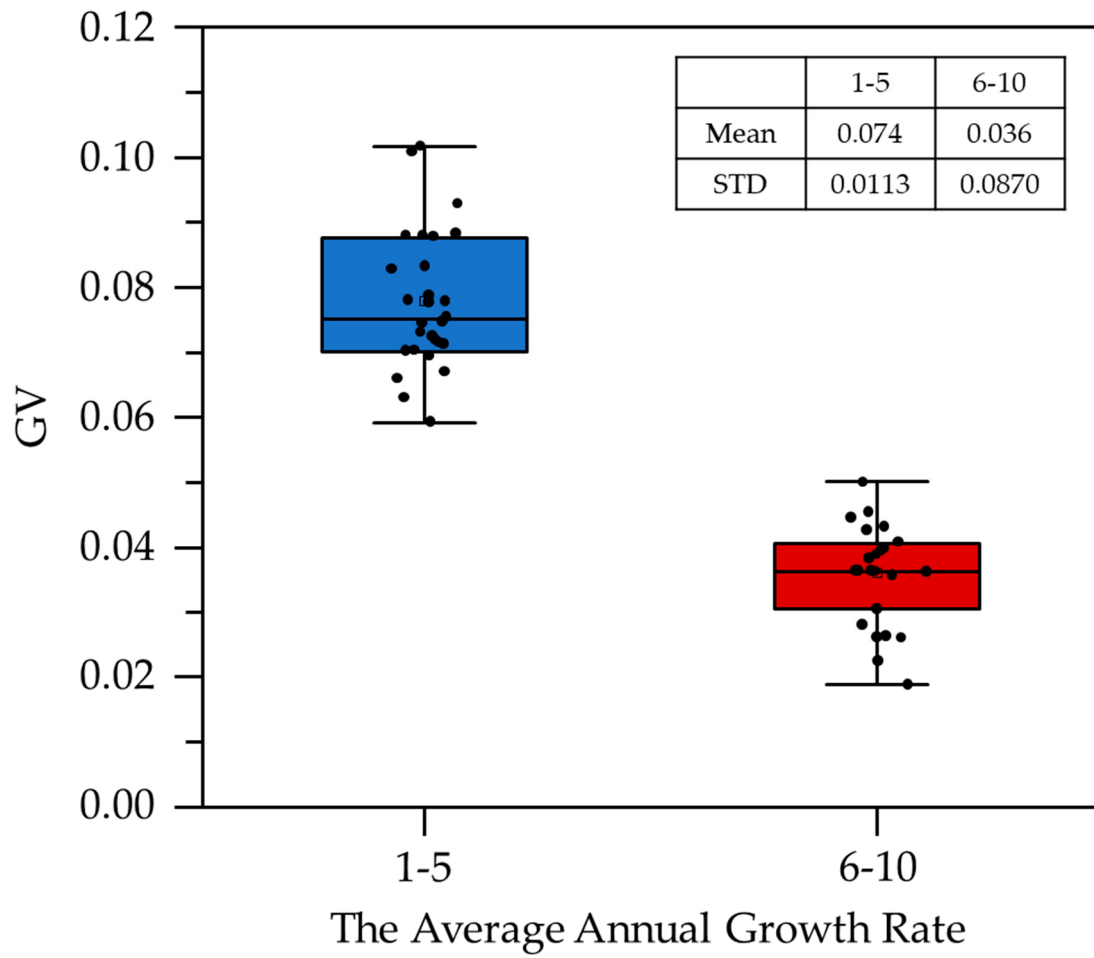

**Figure S3.** The average annual growth rate of different age groups.

Table S3. BP neural network input data of Guanli

| Year  |       | 2020   | 2019   | 2018   | 2017   | 2016   | 2015   |
|-------|-------|--------|--------|--------|--------|--------|--------|
| Age   | 1     | 73.17  | 79.29  | 27.27  | 33.66  | 275.49 | 50.58  |
|       | 2     | 79.29  | 27.27  | 33.66  | 275.49 | 50.58  | 100.98 |
|       | 3     | 27.27  | 33.66  | 275.49 | 50.58  | 100.98 | 219.87 |
|       | 4     | 33.66  | 275.49 | 50.58  | 100.98 | 219.87 | 329.94 |
|       | 5     | 275.49 | 50.58  | 100.98 | 219.87 | 329.94 | 579.78 |
|       | 6     | 50.58  | 100.98 | 219.87 | 329.94 | 579.78 | 199.44 |
|       | 7     | 100.98 | 219.87 | 329.94 | 579.78 | 199.44 | 235.26 |
|       | 8     | 219.87 | 329.94 | 579.78 | 199.44 | 235.26 | 247.86 |
|       | 9     | 329.94 | 579.78 | 199.44 | 235.26 | 247.86 | 101.07 |
|       | 10    | 579.78 | 199.44 | 235.26 | 247.86 | 101.07 | 124.92 |
|       | 11    | 199.44 | 235.26 | 247.86 | 101.07 | 124.92 | 196.56 |
|       | 12    | 235.26 | 247.86 | 101.07 | 124.92 | 196.56 | 298.98 |
|       | 13    | 247.86 | 101.07 | 124.92 | 196.56 | 298.98 | 57.6   |
|       | 14    | 101.07 | 124.92 | 196.56 | 298.98 | 57.6   | 86.04  |
|       | 15    | 124.92 | 196.56 | 298.98 | 57.6   | 86.04  | 204.66 |
|       | 16    | 196.56 | 298.98 | 57.6   | 86.04  | 204.66 | 145.17 |
|       | 17    | 298.98 | 57.6   | 86.04  | 204.66 | 145.17 | 93.33  |
|       | 18    | 57.6   | 86.04  | 204.66 | 145.17 | 93.33  | 19.08  |
|       | 19    | 86.04  | 204.66 | 145.17 | 93.33  | 19.08  | 155.7  |
|       | 20    | 204.66 | 145.17 | 93.33  | 19.08  | 155.7  | 399.78 |
|       | 21    | 145.17 | 93.33  | 19.08  | 155.7  | 399.78 | 351.18 |
|       | 22    | 93.33  | 19.08  | 155.7  | 399.78 | 351.18 | 253.44 |
|       | 23    | 19.08  | 155.7  | 399.78 | 351.18 | 253.44 | 359.55 |
|       | 24    | 155.7  | 399.78 | 351.18 | 253.44 | 359.55 | 64.8   |
|       | 25    | 399.78 | 351.18 | 253.44 | 359.55 | 64.8   | 45     |
|       | 26    | 351.18 | 253.44 | 359.55 | 64.8   | 45     | 104.94 |
|       | 27    | 253.44 | 359.55 | 64.8   | 45     | 104.94 | 46.8   |
|       | 28-32 | 621.09 | 333.56 | 496.76 | 401.53 | 278.04 | 900.39 |
| Yield |       | 175455 | 178252 | 176931 | 165223 | 176017 | 188240 |
